# Supplementary material for: Interface engineering of Ru/RuO 2 heterostructures on carbon nanotubes for efficient and stable acidic oxygen evolution
Source: Royal Society of Chemistry journal article supplement (doi:10.1039/d5dt02636a), 2025-12-26
Supplement: d5dt02636a1.pdf [file d5dt02636a1.pdf]

# **Interface Engineering of Ru/RuO<sub>2</sub> Heterostructures on Carbon Nanotubes for Efficient and Stable Acidic Oxygen Evolution**

Dazhou Kuang<sup>a,b</sup>, Sheng Yao<sup>a,b</sup>, Yang Yang<sup>\*a</sup>, Fangcai Zheng<sup>\*a,b</sup>, Hui Wang<sup>\*a,b</sup>

<sup>a</sup> Hefei National Research Centre for Physical Sciences at the Microscale, University of Science and Technology of China, Hefei, Anhui, 230026, P.R. China.

<sup>b</sup> High Magnetic Field Laboratory, Hefei Institutes of Physical Science, Chinese Academy of Sciences, Hefei 230031, Anhui/P. R. China

## 1.Experimental Section

### 1.1 Chemical Reagents.

All reagents are of analytical grade and ready for use without further purification. Nitrogen-doped carbon nanotubes, benzene-1,3,5-benzenetricarboxylic acid ( $C_9H_6O_6$ ), and ethanol ( $C_2H_5OH$ ) were procured from Shanghai Aladdin Company Limited. Concentrated sulfuric acid ( $H_2SO_4$ ) was obtained from Sinopharm Chemical Reagent limited corporation. Anhydrous ruthenium trichloride ( $RuCl_3$ ) was procured from J&K Scientific Ltd. The deionized (DI) water used throughout all experiments was purified through a Millipore system.

### 1.2 Material synthesis

A quantity of 5 mg of nitrogen-doped carbon nanotubes was placed into a mixture of 10 mL of water and 10 mL of ethanol. The mixture was then stirred for a period of one hour in order to create a homogeneous dispersion. Following this, 28.2 mg of  $RuCl_3$  was added and the mixture was stirred for a further hour. Then, 66.8 mg of benzene-1,3,5-benzenetricarboxylic acid was added and the mixture was stirred for a period of 4-6 hours. In conclusion, the substance was loaded into centrifuge tubes and subsequently introduced into a freeze dryer. The precursor was obtained following the drying process. The precursor was heated to 600 °C at a heating rate of 10 °C/min under an  $N_2$  atmosphere and held for two hours to obtain black  $Ru@CNT$ . This was then oxidized at low temperatures to obtain  $Ru/RuO_2@CNT-250$ ,  $Ru/RuO_2@CNT-300$ , and  $Ru/RuO_2@CNT-350$  by oxidizing the precursor at low temperatures under an air atmosphere at 250 °C, 300 °C, and 350 °C, respectively. The precursor was subjected to oxidation at elevated temperatures, resulting in the formation of  $RuO_2@CNT$ .

### 1.3 Characterization.

Powder XRD pattern was performed using a Japan Rigaku D/Max- $\gamma$ A X-ray diffractometer equipped with Cu-K $\alpha$  radiation. Morphologies and size of all as-synthesized samples were systematically characterized through scanning electron microscopy (SEM, Regulus 8230). Transmission electron microscopy (TEM) images were taken on a TEM (JEOL JEM-F200) and transmission electron microscopy (TEM,

Hitachi H-7650) equipped with Super-X energy dispersive X-ray (EDX) spectroscopy. X-ray photoelectron spectroscopy (XPS) analysis was carried out on an X-ray photoelectron spectrometer (ThermoFisher Escalab 250Xi) using Al-K $\alpha$  radiation. Raman scattering measurement was performed using a Horiba Jobin Yvon T64000 Micro-Raman instrument with a torus 532 laser ( $\lambda=532$  nm) as an excitation source.

#### 1. 4 Calculation details:

We perform DFT calculations using the Vienna Ab Initio Simulation Package (VASP), the generalized gradient approximation (GGA) of Perdew–Becke–Ernzerhof (PBE) is used for the exchange-correlation functional. The cut-off energy for plane waves is 400 eV, providing a convergence of  $10^{-5}$  eV in total energy and 0.02 eV/Å in Hellmann Feynman force on each atom. The k-point mesh of  $3 \times 3 \times 1$  and  $9 \times 9 \times 3$  were used to represent the Brillouin zone for structure optimization and density of states (DOS) calculation, respectively. As for OER, the free energies of the intermediates at 298.15 K were obtained using  $\Delta G = \Delta E + \Delta ZPE - T\Delta S + eU$  according to previous work, where  $\Delta E$  is the binding energy of adsorption species HO\*, O\* and HOO\*,  $\Delta ZPE$ ,  $\Delta S$  and  $U$  are the zero point energy changes, entropy changes and applied potentials, respectively.

#### 1.5 Electrochemical measurements.

All electrochemical experiments were conducted at ambient temperature using an electrochemical workstation (CHI 760E) in a three-electrode system. The cell comprised a glassy carbon working electrode (GC electrode, diameter 3 mm, catalyst loading  $\sim 0.510$  mg cm $^{-2}$ ), a Hg/HgSO $_4$  (saturated K $_2$ SO $_4$  solution) reference electrode and a platinum mesh electrode. In this study, all potentials are expressed in relation to the transformed reversible hydrogen electrode (RHE) ( $ERHE = E_{Hg/Hg_2SO_4} + 0.656 + 0.0592$  pH). The overpotential ( $\eta$ ) of the oxygen evolution reaction (OER) is defined as  $ERHE - 1.23$  V. The working electrodes were prepared by applying 5  $\mu$ L of catalyst ink to glassy carbon (GC) and drying at room temperature. The electrode was meticulously polished by applying 0.05  $\mu$ m Al $_2$ O $_3$  powder prior to its utilization, and the electrode was

thoroughly rinsed with deionized water and ethanol. A quantity of 2 mg of catalyst was dispersed in a solution comprising 190  $\mu\text{L}$  of ethanol, 65  $\mu\text{L}$  of deionized water and 25  $\mu\text{L}$  of Nafion solution (Sigma Aldrich, 5 wt %). The dispersion was then subjected to ultrasonication for a minimum of 30 minutes, with the objective of forming a homogeneous catalyst ink. The OER data were collected in  $\text{O}_2$ -saturated 0.5 M  $\text{H}_2\text{SO}_4$ . LSV curves were acquired at a scan rate of 5 mV/s. Cyclic voltammetry (CV) was conducted within the potential range of 1.05 to 1.50 V vs. RHE at a scan rate of 100 mV/s for a total of 2500 cycles, with the objective of assessing the long-term cycling stability. Electrochemical impedance spectroscopy (EIS) measurements were conducted for OER within the frequency range of 0.01 Hz to  $10^6$  Hz.

Under conditions of open circuit voltage, the electrochemically active surface areas (ECSAs) of the catalysts were estimated by electrochemical double layer capacitance ( $C_{\text{dl}}$ ). The  $C_{\text{dl}}$  was measured from the double-layer charging curves using cyclic voltammetry (CV) with scan rates ranging from 20 to 100 mV s<sup>-1</sup> and OERs ranging from 1.05 to 1.15 V vs. RHE, corresponding to non-Faraday capacitance current densities of 1.1 V vs. RHE, and  $\Delta j/2$ ) at RHE as a linear curve with scan rate, with a slope of  $C_{\text{dl}}$ . ECSA was calculated from the double-layer capacitance according to  $\text{ECSA} = C_{\text{dl}}/\text{CS}$ , where CS is the specific capacitance of the sample. The general specific capacitance value of 0.035 mF cm<sup>-2</sup> utilized in this study is based on values commonly reported in the extant literature

### **1.6 In-situ Fourier transform infrared spectroscopy measurements:**

The in-situ Fourier transform infrared spectroscopy (FT-IR) measurements were carried out using the Nicolet iS50 FT-IR spectrometer to investigate the potential dependence of intermediates and determine the reaction mechanism of OER. In situ infrared reflectance spectroscopy (IRAS) measurements were performed in a 0.5 M  $\text{H}_2\text{SO}_4$  solution using a three-electrode system. The working electrode was prepared by loading the catalyst onto a glassy carbon electrode. An Ag/AgCl electrode (in a saturated KCl solution) and a platinum wire served as the reference and counter electrodes, respectively. Prior to data acquisition, the working electrode was pressed against a  $\text{CaF}_2$  infrared window in order to obtain a thin electrolyte layer. Subsequently,

sample and reference spectra were acquired at corresponding electrode potentials. The FT-IR spectra were recorded over the range of 1000 to 4000  $\text{cm}^{-1}$  at various potentials and under different conditions of polarization. It is important to note that each measurement was of a duration of at least 2 minutes in order to ensure stable current.

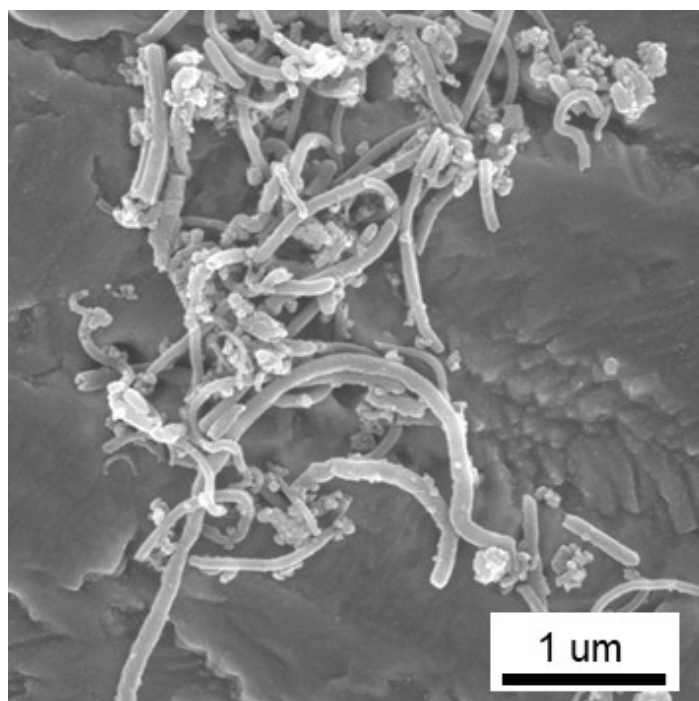

**Figure S1.** SEM image of Ru/RuO<sub>2</sub>@CNT-300.

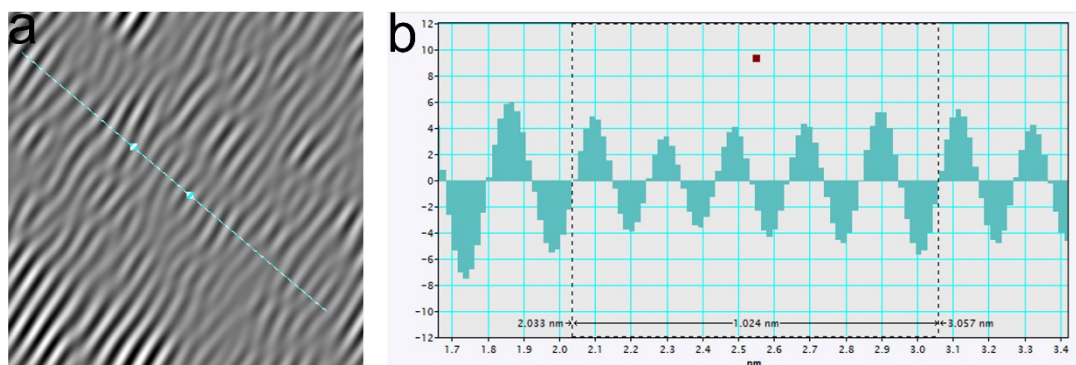

**Figure S2.** (a) HAADF-TEM image of the Ru/RuO<sub>2</sub>@CNT-300 catalyst. (b) Ru/RuO<sub>2</sub>@CNT-300 Ru(101) crystallographic spacing measurements of crystal faces.

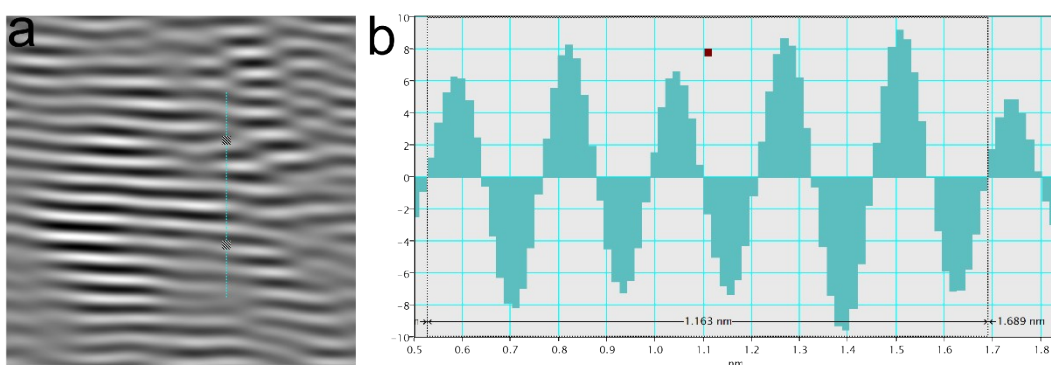

**Figure S3.** (a) HAADF-TEM image of the Ru/RuO<sub>2</sub>@CNT-300 catalyst. (b) Ru/RuO<sub>2</sub>@CNT-300 Ru(100) crystallographic spacing measurements of crystal faces.

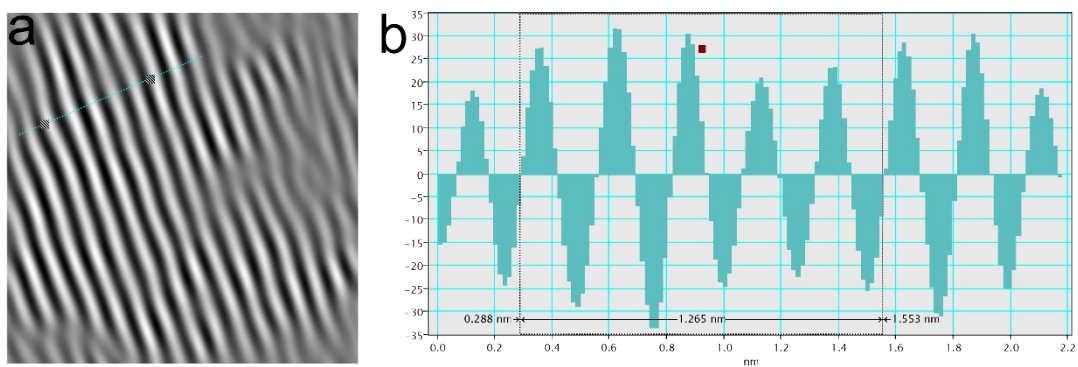

**Figure S4.** (a) HAADF-TEM image of the Ru/RuO<sub>2</sub>@CNT-300 catalyst. (b) Ru/RuO<sub>2</sub>@CNT-300 RuO<sub>2</sub>(101) crystallographic spacing measurements of crystal faces.

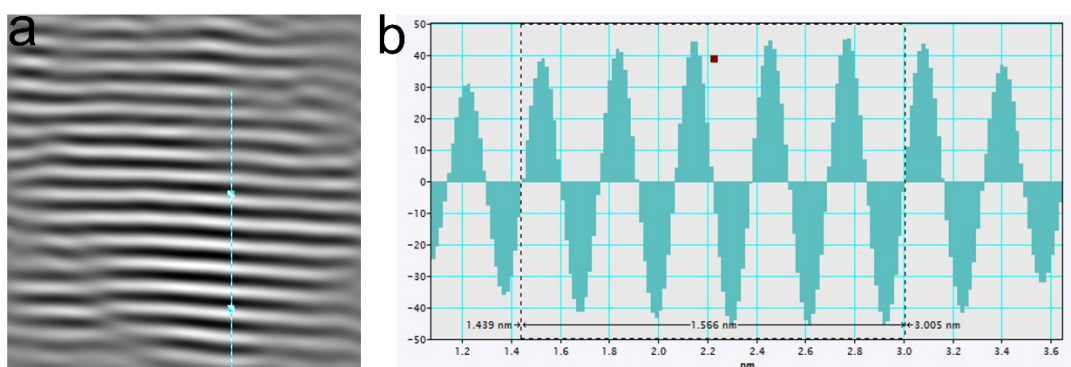

**Figure S5.** (a) HAADF-TEM image of the Ru/RuO<sub>2</sub>@CNT-300 catalyst. (b) Ru/RuO<sub>2</sub>@CNT-300 RuO<sub>2</sub>(110) crystallographic spacing measurements of crystal faces.

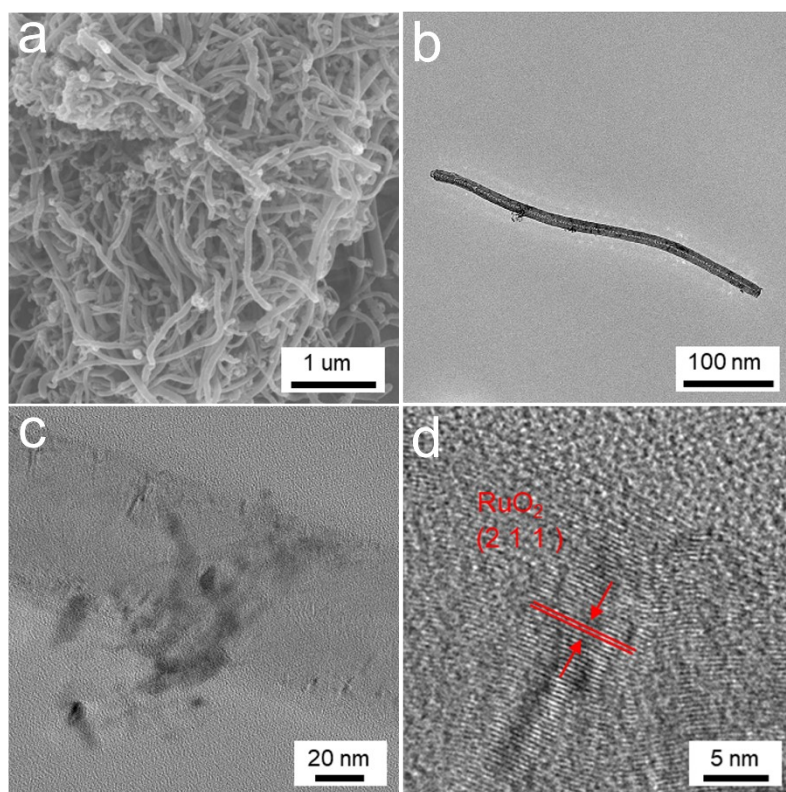

**Figure S6.** (a) SEM and (b,c,d) TEM images of RuO<sub>2</sub>@CNT

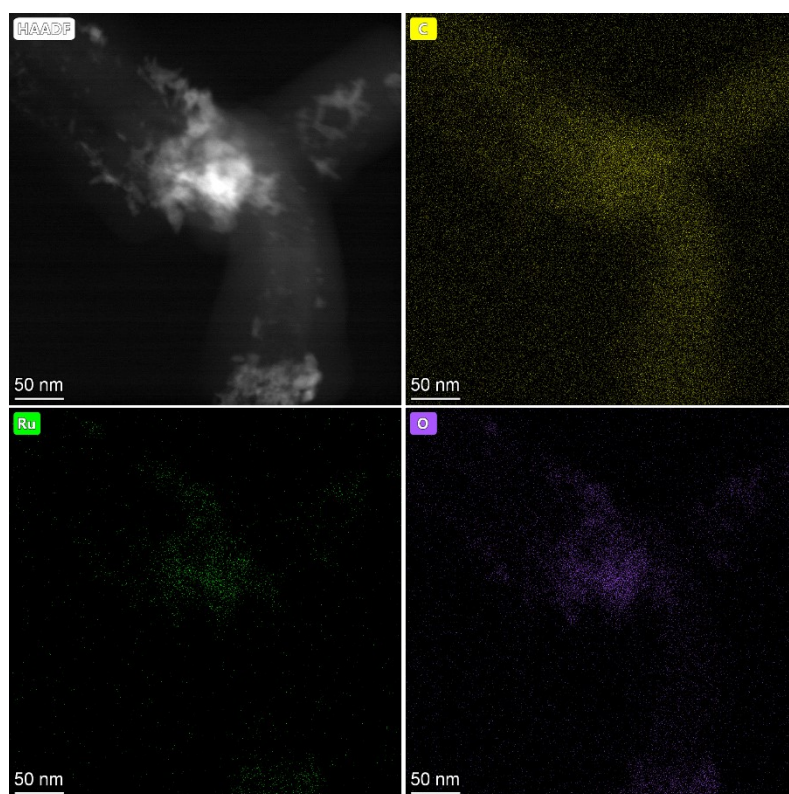

**Figure S7.** EDS mappings of RuO<sub>2</sub>@CNT

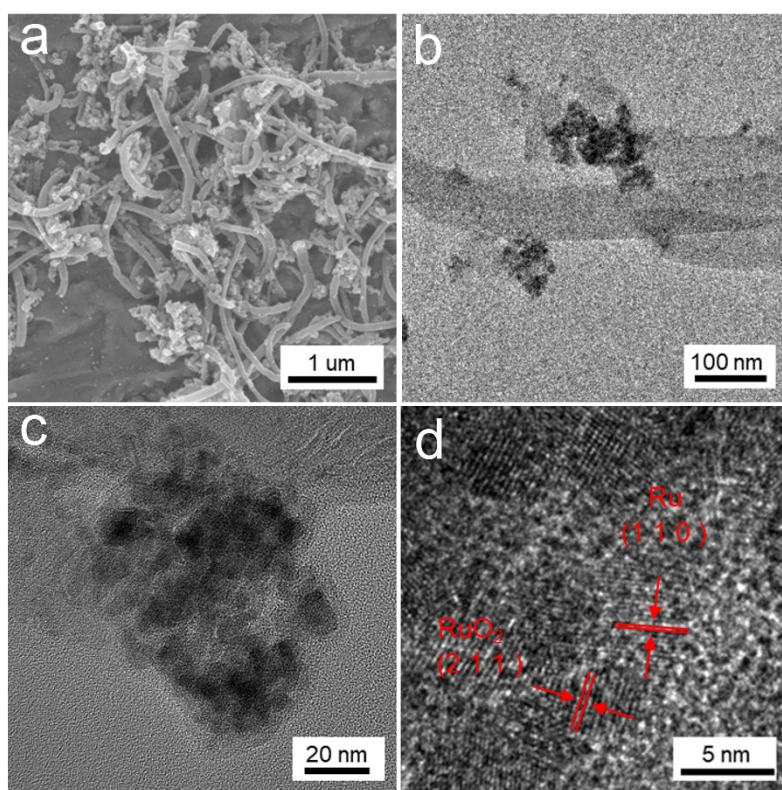

**Figure S8.** (a) SEM and (b-d) TEM images of Ru/RuO<sub>2</sub>@CNT-350

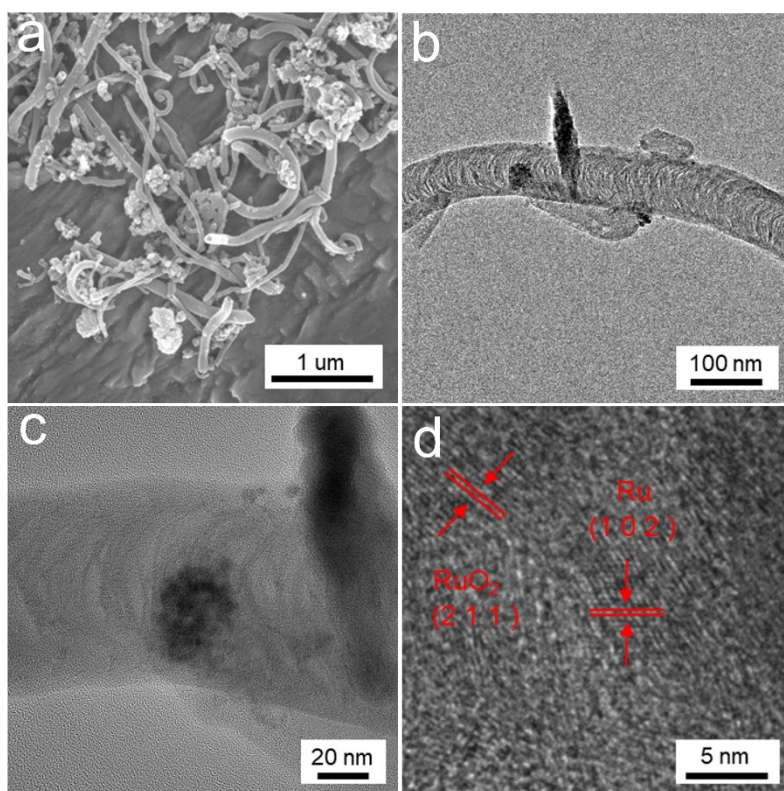

**Figure S9.** (a) SEM and (b-d) TEM images of Ru/RuO<sub>2</sub>@CNT-250

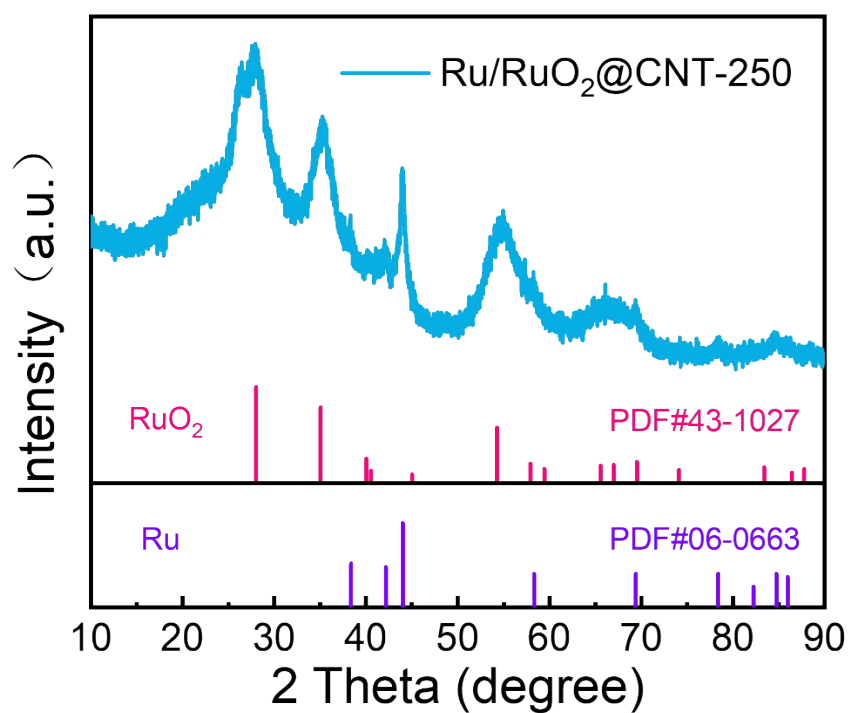

**Figure S10.** XRD pattern of Ru/RuO<sub>2</sub>@CNT-250.

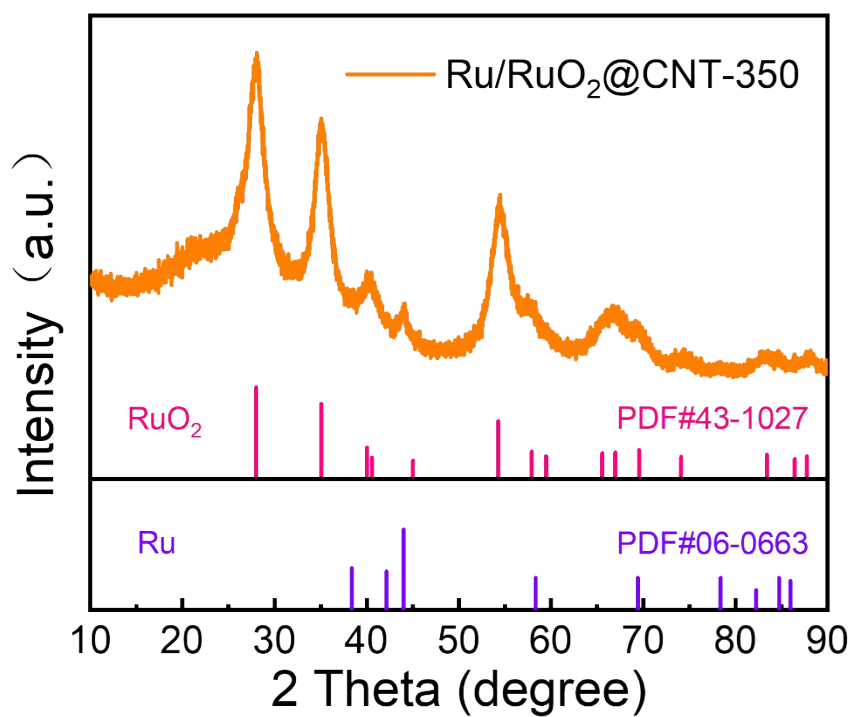

**Figure S11.** XRD pattern of Ru/RuO<sub>2</sub>@CNT-350.

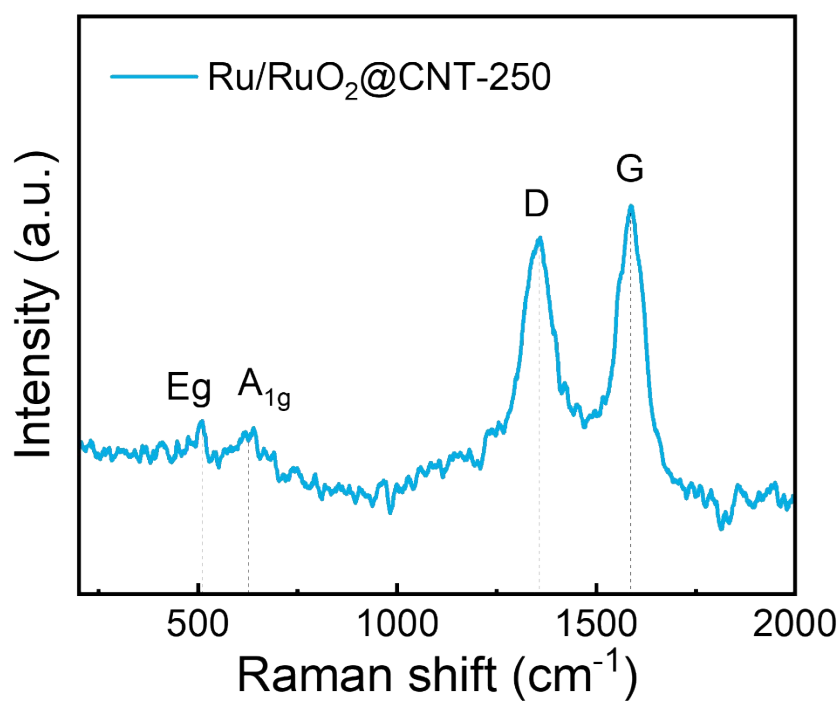

**Figure S12.** Raman spectrum of Ru/RuO<sub>2</sub>@CNT-250.

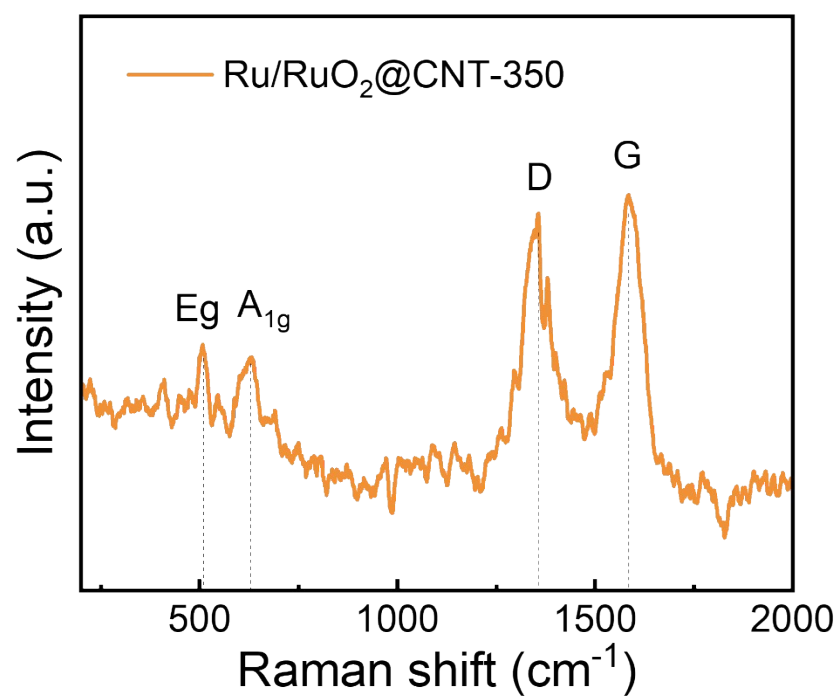

**Figure S13.** Raman spectrum of Ru/RuO<sub>2</sub>@CNT-350.

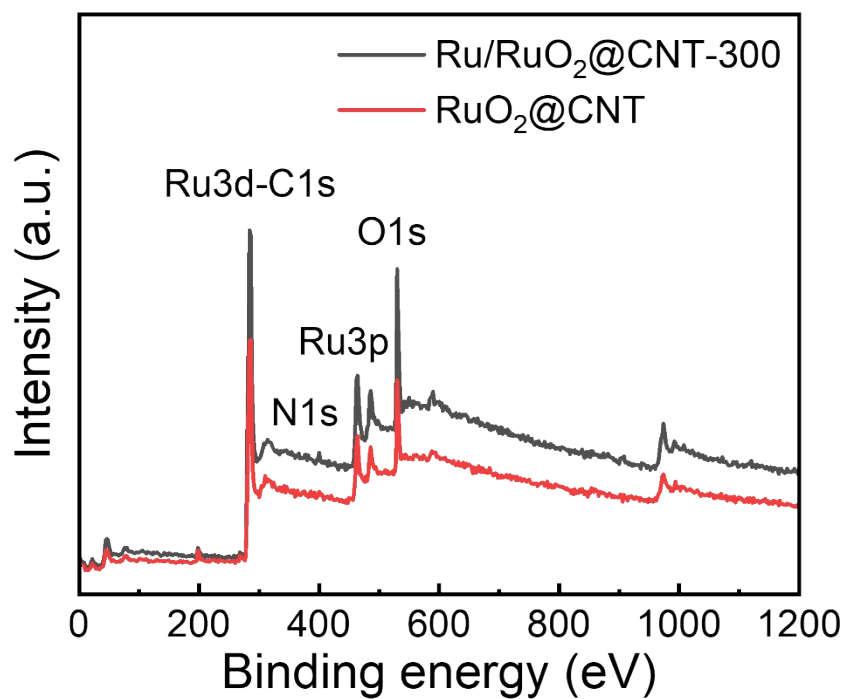

**Figure S14.** XPS survey spectra of Ru/RuO<sub>2</sub>@CNT-300 and RuO<sub>2</sub>@CNT.

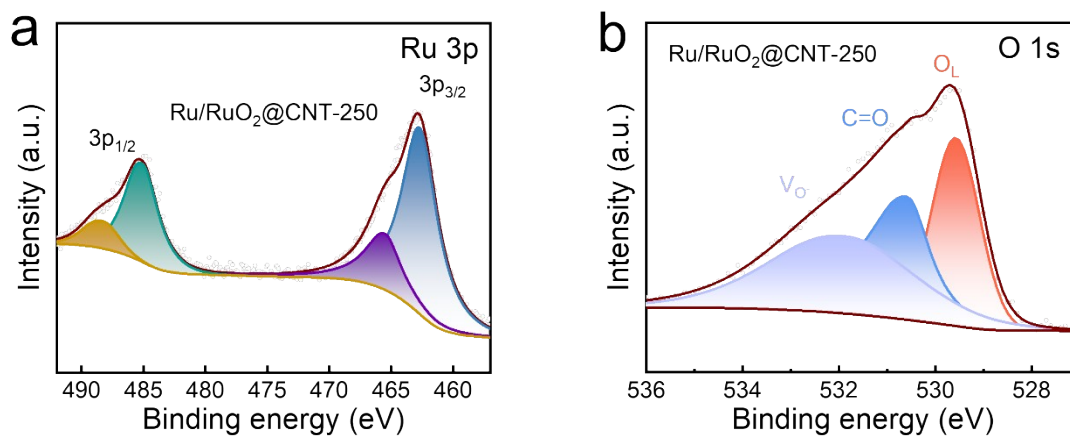

**Figure S15.** High-resolution spectra of (a) Ru 3p and (b) O 1s for Ru/RuO<sub>2</sub>@CNT-250.

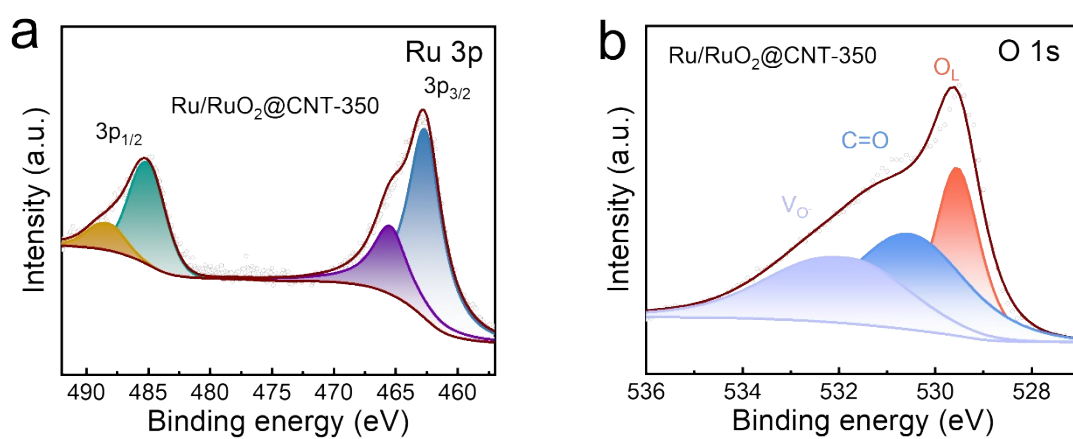

**Figure S16.** High-resolution spectra of (a) Ru 3p and (b) O 1s for Ru/RuO<sub>2</sub>@CNT-350.

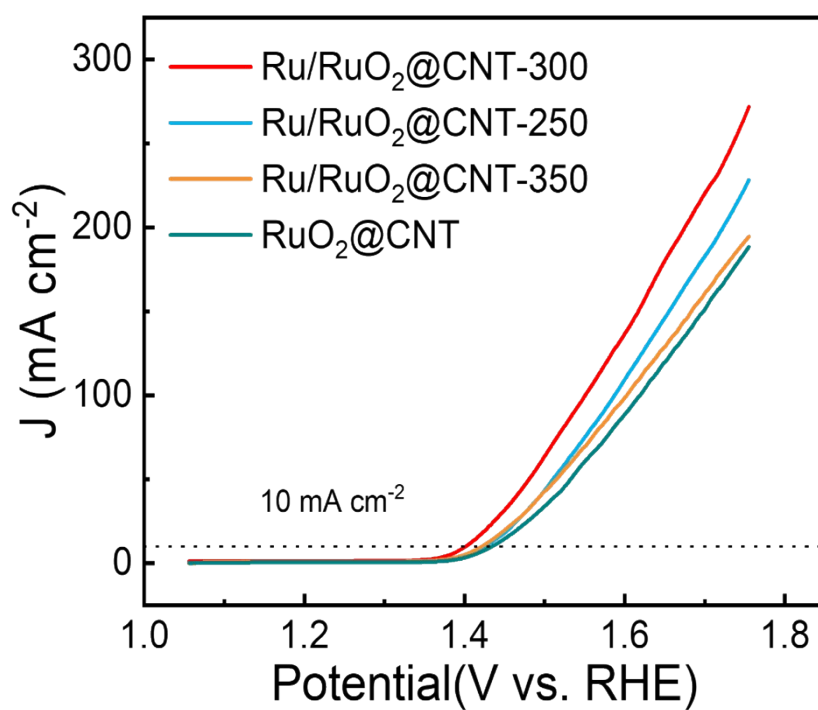

**Figure S17.** LSV Diagram Without IR Compensation.

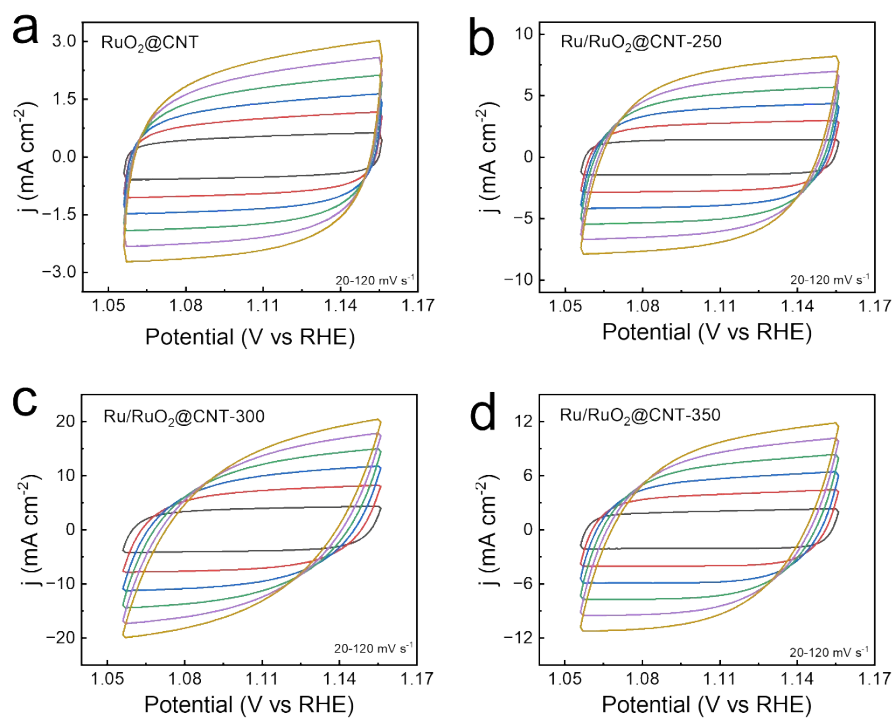

**Figure S18.** The OER CV curves of (a)  $\text{RuO}_2@\text{CNT}$ , (b)  $\text{Ru/RuO}_2@\text{CNT-250}$ , (c)  $\text{Ru/RuO}_2@\text{CNT-300}$  and (d)  $\text{Ru/RuO}_2@\text{CNT-350}$  with different scan rates in 0.5 M  $\text{H}_2\text{SO}_4$ .

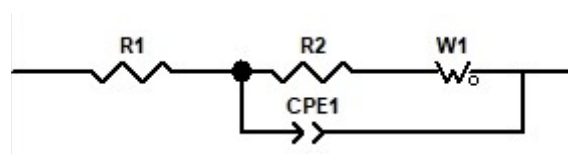

**Figure S19.** Circuit diagram for EIS fitting.

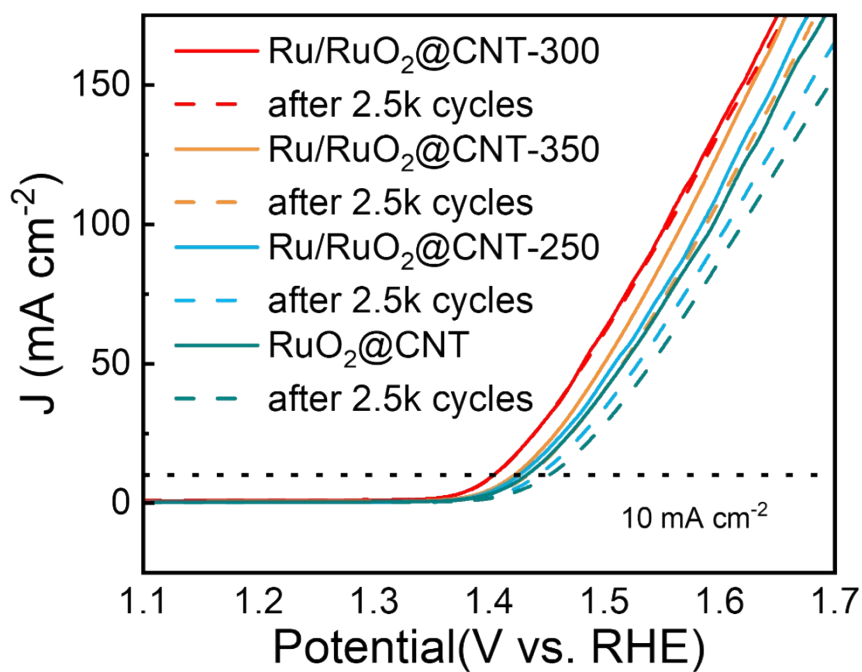

**Figure S20.** LSV curves before and after 2500 CV tests at 100 mV s<sup>-1</sup>.

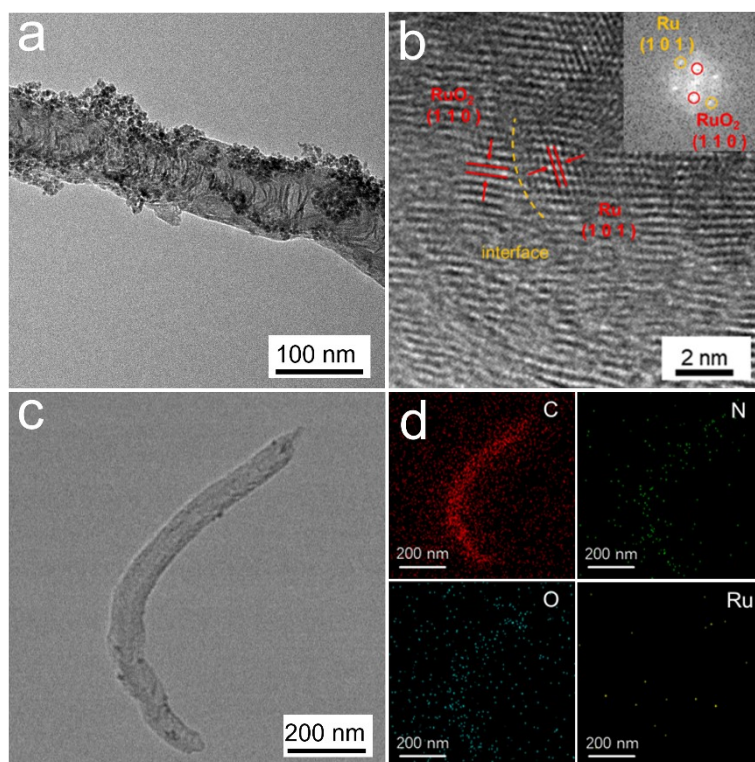

**Figure S21.** (a,b) TEM images of Ru/RuO<sub>2</sub>@CNT-300 during OER test in 0.5 M H<sub>2</sub>SO<sub>4</sub>. (c,d) EDS mappings of Ru/RuO<sub>2</sub>@CNT-300 during OER test in 0.5 M H<sub>2</sub>SO<sub>4</sub>.

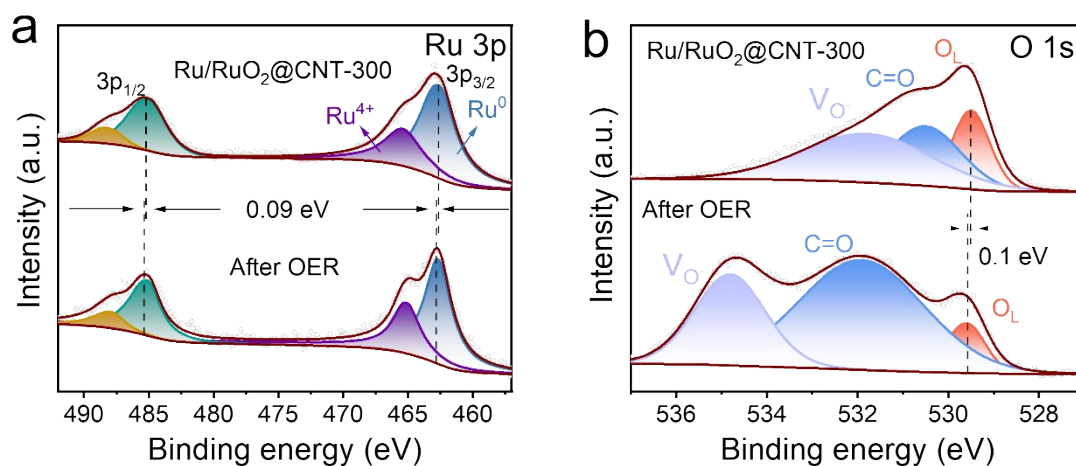

**Figure S22.** (a) Ru 3p, (b) O 1s XPS spectra of Ru/RuO<sub>2</sub>@CNT-300 before and after OER test.

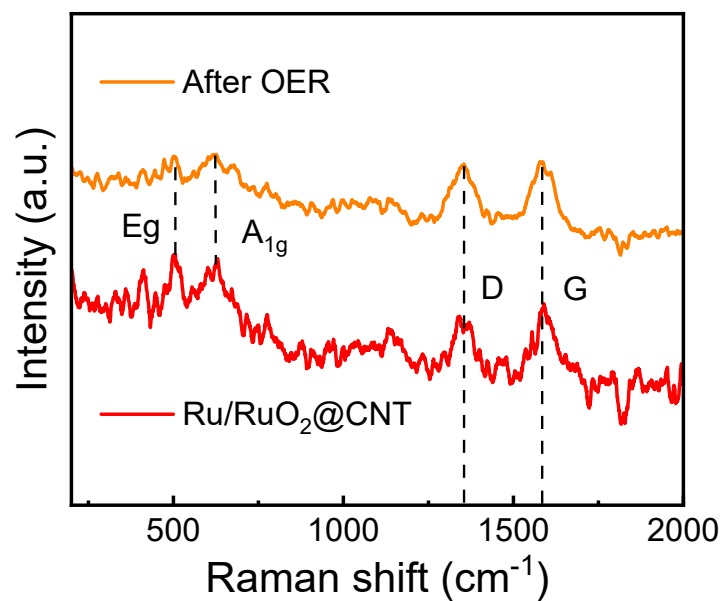

**Figure S23:** Raman spectra of Ru/RuO<sub>2</sub>@CNT-300 before and after oxygen evolution reaction (OER) testing.

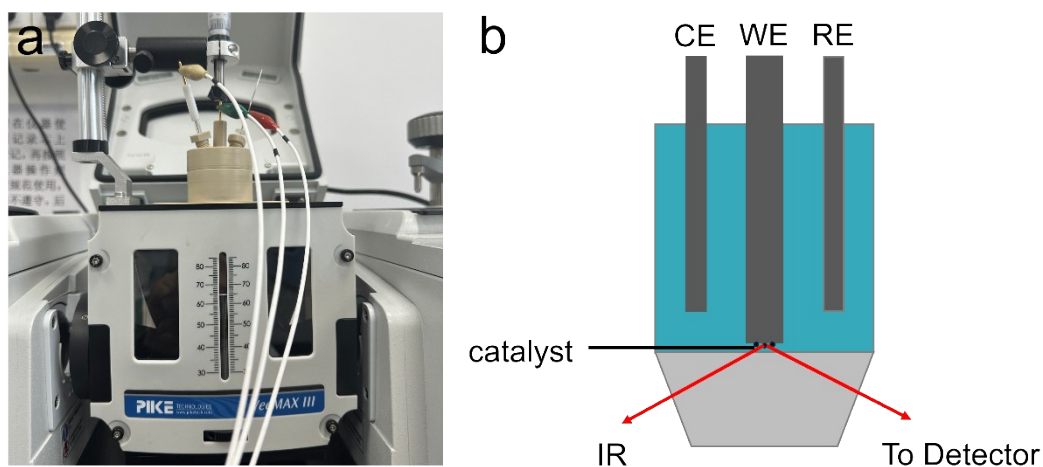

**Figure S24.** (a) Photograph and (b) schematic illustration of the setup for in-situ IRAS measurements.

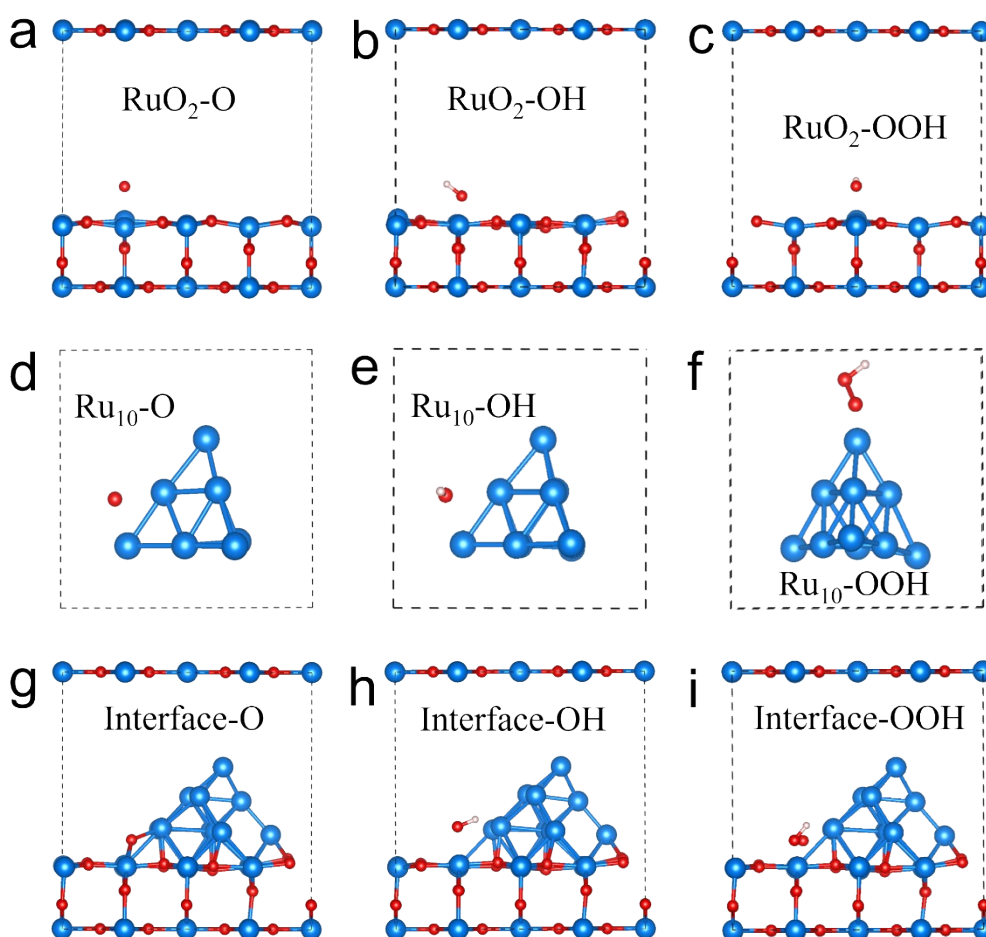

**Figure S25.** (a-c) RuO<sub>2</sub> (110) surface, (d-f) Ru cluster (Ru<sub>10</sub>), (g-i) Ru/RuO<sub>2</sub> adsorption model.

**Table S1. OER performance on Ru/RuO<sub>2</sub>@CNT-300 in comparison with the recently reported electrocatalysts in acidic and alkaline media.**

| Catalyst                                                | Electrolyte                              | Overpotential<br>@ 10 mA cm <sup>-2</sup> | Stability<br>@ 10 mA<br>cm <sup>-2</sup> | Reference        |
|---------------------------------------------------------|------------------------------------------|-------------------------------------------|------------------------------------------|------------------|
| <b>Ru/RuO<sub>2</sub>@CNT-300</b>                       | <b>0.5 M H<sub>2</sub>SO<sub>4</sub></b> | <b>169 mV</b>                             | <b>120 h</b>                             | <b>This work</b> |
| <b>IrO<sub>x</sub>/WO<sub>3</sub></b>                   | <b>0.5 M H<sub>2</sub>SO<sub>4</sub></b> | <b>260 mV</b>                             | <b>100 h</b>                             | <b>1</b>         |
| <b>Nd<sub>0.1</sub>RuO<sub>x</sub>/CC</b>               | <b>0.5 M H<sub>2</sub>SO<sub>4</sub></b> | <b>211 mV</b>                             | <b>50 h</b>                              | <b>2</b>         |
| <b>Co-RuO<sub>2</sub>/TiO<sub>2</sub></b>               | <b>0.5 M H<sub>2</sub>SO<sub>4</sub></b> | <b>266 mV</b>                             | <b>50 h</b>                              | <b>3</b>         |
| <b>RuO<sub>2</sub>/(Co,Mn)<sub>3</sub>O<sub>4</sub></b> | <b>0.5 M H<sub>2</sub>SO<sub>4</sub></b> | <b>270 mV</b>                             | <b>24 h</b>                              | <b>4</b>         |
| <b>Cr<sub>2</sub>O<sub>3</sub>/RuO<sub>2</sub></b>      | <b>0.5 M H<sub>2</sub>SO<sub>4</sub></b> | <b>220 mV</b>                             | <b>100 h</b>                             | <b>5</b>         |
| <b>Co<sub>3</sub>O<sub>4</sub>/NC-250</b>               | <b>0.5 M H<sub>2</sub>SO<sub>4</sub></b> | <b>225 mV</b>                             | <b>80 h</b>                              | <b>6</b>         |
| <b>H/d-MnO<sub>x</sub>-RuO<sub>2</sub></b>              | <b>0.5 M H<sub>2</sub>SO<sub>4</sub></b> | <b>178 mV</b>                             | <b>40 h</b>                              | <b>7</b>         |
| <b>Ru/Se-RuO<sub>2</sub></b>                            | <b>0.5 M H<sub>2</sub>SO<sub>4</sub></b> | <b>190 mV</b>                             | <b>24 h</b>                              | <b>8</b>         |
| <b>a/c-RuO<sub>2</sub></b>                              | <b>0.1 M HClO<sub>4</sub></b>            | <b>205 mV</b>                             | <b>60 h</b>                              | <b>9</b>         |
| <b>Nd<sub>6</sub>Ir<sub>2</sub>O<sub>13</sub></b>       | <b>0.1 M HClO<sub>4</sub></b>            | <b>291 mV</b>                             | <b>19.5 h</b>                            | <b>10</b>        |
| <b>MgNiO<sub>2</sub>/rGO</b>                            | <b>1 M KOH</b>                           | <b>209 mV</b>                             | <b>50h</b>                               | <b>11</b>        |

**Table S2. ICP-AES results of prepared samples.**

| Samples                           | Ru (wt %)   |
|-----------------------------------|-------------|
| <b>Ru/RuO<sub>2</sub>@CNT-300</b> | <b>2.25</b> |
| <b>After OER</b>                  | <b>2.24</b> |

## Supplementary References

1. J. Xu, H. Jin, T. Lu, J. Li, Y. Liu, K. Davey, Y. Zheng, S.-Z. Qiao. *Sci. Adv.* **9**, eadh1718.
2. L. Li, G. Zhang, J. Xu, H. He, B. Wang, Z. Yang, S. Yang. *Adv. Funct. Mater.* 2023, **33**, 2213304.
3. L. Lu, Z. Xu, S. Wei, S. Zhao, X. Du, Y. Wang, L. Wu, G. Liu. *Chem. Eng. J.* 2024, **500**, 157107.
4. S. Niu, X.-P. Kong, S. Li, Y. Zhang, J. Wu, W. Zhao, P. Xu. *App. Catal. B: Environ.* 2021, **297**, 120442.
5. J. Zhao, N. Yao, W. Luo. *ChemistrySelect* 2025, **10**, e01065.
6. X. Yang, J. Cheng, H. Li, Y. Xu, W. Tu, J. Zhou. *Chem. Eng. J.* 2023, **465**, 142745.
7. Z. Wu, Y. Wang, D. Liu, B. Zhou, P. Yang, R. Liu, W. Xiao, T. Ma, J. Wang, L. Wang. *Adv. Funct. Mater.* 2023, **33**, 2307010.
8. K. Huang, C. Lin, G. Yu, P. Du, X. Xie, X. He, Z. Zheng, N. Sun, H. Tang, X. Li, M. Lei, H. Wu. *Adv. Funct. Mater.* 2023, **33**, 2211102.
9. L. Zhang, H. Jang, H. Liu, M.G. Kim, D. Yang, S. Liu, X. Liu, J. Cho. *Angew. Chem. Int. Ed.* 2021, **60**, 18821-18829.
10. L. Zhang, Y. Wang, Y. Wang, H. Liu, Q. Qin, X. Liu. *ACS Sustainable Chem. Eng.* 2022, **10**, 10658-10665.
11. K. Ashfaq, F.F. Alharbi, A. Kumar, M. Faizan, B. Kanabar, N. Beemkumar, P. Pradhan, T. Aggarwal, M.A. Al-Anber, A.D. Oza. *J Inorg Organomet P* 2025.
